# Supplementary material for: High Sensitivity Gas Detection Using a Macroscopic Three-Dimensional Graphene Foam Network
Source: PubMed Central journal article supplement — Sci Rep. 2011 Nov 23;1:166. doi: 10.1038/srep00166 (PMC3240974; doi:10.1038/srep00166), 2011-11-23
Supplement: srep00166-s1.pdf [file srep00166-s1.pdf]

# **Supplementary Information**

## **High Sensitivity Gas Detection Using a Macroscopic Three-Dimensional Graphene Foam Network**

Fazel Yavari<sup>1†</sup>, Zongping Chen<sup>2†</sup>, Abhay V. Thomas<sup>1</sup>, Wencai Ren<sup>2</sup>,  
Hui-Ming Cheng<sup>2\*</sup> and Nikhil Koratkar<sup>1,3\*</sup>

<sup>1</sup>*Department of Mechanical, Aerospace and Nuclear Engineering, Rensselaer Polytechnic Institute, 110 8<sup>th</sup> Street, Troy, New York 12180-3590, USA*

<sup>2</sup>*Shenyang National Laboratory for Materials Science, Institute of Metal Research, Chinese Academy of Sciences, Shenyang 110016, China*

<sup>3</sup>*Department of Materials Science and Engineering, Rensselaer Polytechnic Institute, 110 8<sup>th</sup> Street, Troy, New York 12180-3590, USA*

† Equal Contribution, \*Correspondence and requests for materials to be addressed to H.M.C. (cheng@imr.ac.cn) and N.K. (koratn@rpi.edu)

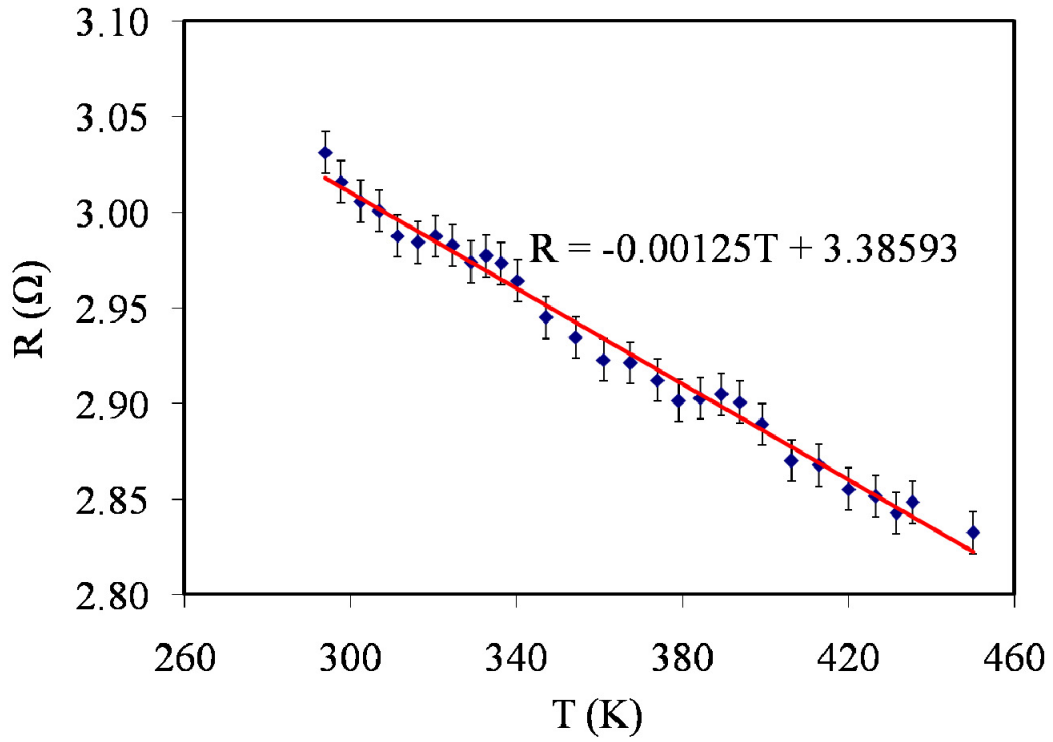

**Figure S1: Resistance of the graphene foam as a function of temperature (applied using an external heater) to calculate the temperature coefficient of resistance.**

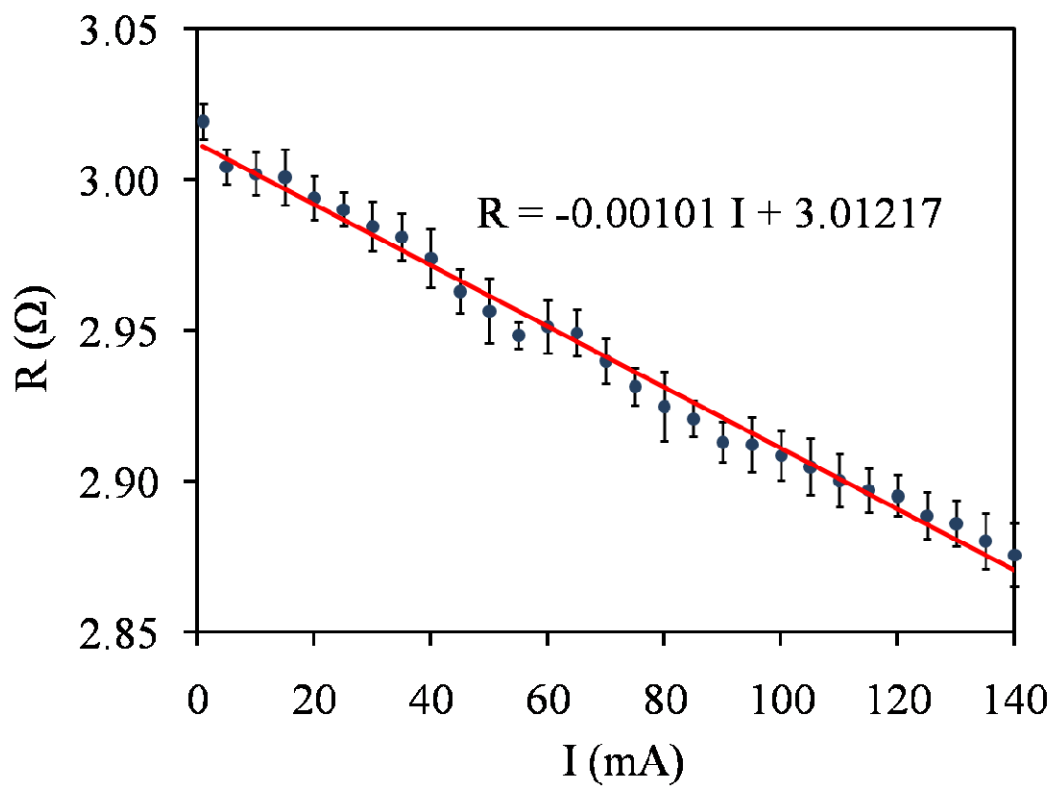

**Figure S2: Resistance of the graphene foam as a function of the current applied to the foam. The current heats the sample (Joule heating) resulting in a reduction in the resistance.**
